# Supplementary material
Source: PubMed Central journal article supplement (PMC5995133)
Supplement: NIHMS957678-supplement-2.pdf [file NIHMS957678-supplement-2.pdf]

**Supplementary Table 2: Aberrant brain network activation in addiction (results per brain regions)**

| First author                  | Drug       | Drug Use Status | N                                  | Task                                          | Interventions    | Behavioral effects                                    | Brain effects                                                                                                                                                                                                                                                                                                                                                                                                                                                                                                                        | Correlation with drug use                                                                                                                                                                                                           | Study Site  | % female | Gender comparison |
|-------------------------------|------------|-----------------|------------------------------------|-----------------------------------------------|------------------|-------------------------------------------------------|--------------------------------------------------------------------------------------------------------------------------------------------------------------------------------------------------------------------------------------------------------------------------------------------------------------------------------------------------------------------------------------------------------------------------------------------------------------------------------------------------------------------------------------|-------------------------------------------------------------------------------------------------------------------------------------------------------------------------------------------------------------------------------------|-------------|----------|-------------------|
| <b>Cue exposure</b>           |            |                 |                                    |                                               |                  |                                                       |                                                                                                                                                                                                                                                                                                                                                                                                                                                                                                                                      |                                                                                                                                                                                                                                     |             |          |                   |
| Lee 2013                      | ALC        | abs             | A 17<br>HC<br>25                   | Drug Cues<br>IAPS<br>(negative<br>+ positive) | n.a.             | A>HC:<br>↑craving                                     | A>HC (Drug): <b>IPL</b><br>A>HC (negative): visual                                                                                                                                                                                                                                                                                                                                                                                                                                                                                   | n.s.                                                                                                                                                                                                                                | Korea       | 29       | no                |
| Seo 2013                      | ALC        | abs             | A 30<br>HC<br>30                   | Drug<br>Script/<br>Stress<br>Script           | TAU              | A>HC:<br>↑craving<br>G*T (A ↑)(Drug<br>Cue): ↑anxiety | HC>A (Drug): <b>anterior insula</b> , premotor, FEF, vmPFC, <b>rACC</b> , <b>OFC</b> , dmPFC, PCC, precuneus, <b>IPL</b> , temporal pole, auditory, visual, cerebellum<br>HC>A (Stress): anterior insula, premotor, FEF, vmPFC, dmPFC, <b>rACC</b> , <b>OFC</b> , PCC, precuneus, <b>IPL</b> , temporal pole, auditory, visual, cerebellum<br>A>HC (Neutral): vmPFC, <b>rACC</b> , PCC, precuneus, visual, cerebellum<br>HC>A (Neutral): <b>anterior insula</b> , premotor, FEF, <b>OFC</b> , <b>IPL</b> , temporal pole, <b>IPL</b> | Relapse (Neutral) ↑: <b>ventral striatum</b> , vmPFC, <b>rACC</b><br>Relapse (Stress) ↓: posterior insula, <b>vlPFC</b> , vmPFC, <b>rACC</b> , PCC, auditory<br>Craving ↑: <b>ventral striatum</b> , vmPFC, <b>rACC</b> , precuneus | USA         | 22       | no                |
| Kim 2014                      | ALC        | abs             | A 38<br>HC<br>26                   | Drug/Average<br>Videos                        | n.a.             | A>HC:<br>↑craving                                     | A>HC (Drug): <b>aPFC</b><br>HC>A (Drug): visual<br>A>HC (negative): visual<br>HC>A: (negative): hippocampus, dlPFC, auditory                                                                                                                                                                                                                                                                                                                                                                                                         | n.s.                                                                                                                                                                                                                                | Korea       | 29       | no                |
| Sjoerds 2014a                 | ALC        | abs             | A 30<br>HC<br>15                   | Drug Cues                                     | n.a.             | A>HC:<br>↑craving                                     | n.s.                                                                                                                                                                                                                                                                                                                                                                                                                                                                                                                                 | n.s.                                                                                                                                                                                                                                | Netherlands | 47       | no                |
| Wiers 2015                    | ALC        | abs             | A 38<br>HC<br>17                   | Drug Cues                                     | n.a.             | A>HC:<br>↑craving                                     | n.s.                                                                                                                                                                                                                                                                                                                                                                                                                                                                                                                                 | n.a.                                                                                                                                                                                                                                | Germany     | 0        | no                |
| Arcurio 2015                  | ALC        | abs             | A 15<br>HC<br>16                   | Decision<br>to Drink<br>Task                  | n.a.             | A>HC:<br>Endorsed<br>alcohol despite<br>high risk     | A>HC (Endorsed Alcohol): SN, <b>dorsal striatum</b> , <b>anterior insula</b> , <b>vlPFC</b> , <b>dlPFC</b> , <b>SMA</b> , visual, cerebellum<br>G*T (A ↑)(Endorsed Alcohol): <b>anterior insula</b> , <b>vlPFC</b> , premotor, <b>IPL</b> , visual, cerebellum                                                                                                                                                                                                                                                                       | n.a.                                                                                                                                                                                                                                | USA         | 100      | no                |
| Czapla 2017                   | ALC        | abs             | A 19<br>HC<br>21                   | Drug Cue<br>Go/NoGo                           | detox            | n.s.                                                  | A>HC (drug)(conflict): visual, cerebellum<br>A>HC (conflict): vmPFC, dmPFC, <b>rACC</b> , dACC<br>A>HC (conflict)(drug cue): visual<br>HC>A (conflict) (no drug cue): <b>IPL</b> , sensory                                                                                                                                                                                                                                                                                                                                           | n.a.                                                                                                                                                                                                                                | Germany     | 10       | no                |
| de Sousa Fernandes Perna 2017 | ALC<br>CAN | abs             | ALC<br>20<br>CAN<br>21<br>HC<br>20 | Marketing<br>clips with<br>Drug Cues          | CAN<br>or<br>ALC | ALC, CAN > HC:<br><b>approach score<br/>for CAN</b>   | Group difference: <b>hippocampus</b> , precuneus                                                                                                                                                                                                                                                                                                                                                                                                                                                                                     | ALC/CAN administration ↓: <b>SMA</b>                                                                                                                                                                                                | Netherlands | 50       | no                |

|               |                 |       |                                         |                            |      |                                                     |                                                                                                                                                                                                               |                                                                                                                                                                                                                                                                                                                                      |             |    |     |
|---------------|-----------------|-------|-----------------------------------------|----------------------------|------|-----------------------------------------------------|---------------------------------------------------------------------------------------------------------------------------------------------------------------------------------------------------------------|--------------------------------------------------------------------------------------------------------------------------------------------------------------------------------------------------------------------------------------------------------------------------------------------------------------------------------------|-------------|----|-----|
| Cousijn 2012  | CAN             | abs   | A 33<br>HC<br>36                        | Approach-Avoidance Task    | n.a. | n.s.                                                | n.s.                                                                                                                                                                                                          | Lifetime CAN ↑: parahippocampal, amygdala, insula, vIPFC, vmPFC, precuneus, IPL, visual, cerebellum<br>Addiction Severity ↓: dIPFC, dACC                                                                                                                                                                                             | Netherlands | 36 | no  |
| Cousijn 2013a | CAN             | abs   | A 31<br>HC<br>21<br>cU 20               | Drug Cues                  | n.a. | A>HC:<br>↑craving                                   | n.s.                                                                                                                                                                                                          | Addiction Severity ↑: NAc, putamen, caudate, OFC, sgACC, rACC, dmPFC, dACC<br>Craving ↓: dIPFC                                                                                                                                                                                                                                       | Netherlands | 35 | no  |
| Filbey 2016   | CAN             | abs   | A 53<br>HC<br>68                        | Drug Cues                  | n.a. | A>HC:<br>↑craving                                   | G*T (A ↑) (Drug): caudate, pallidum, parahippocampus, thalamus, sgACC, rACC, dACC, dmPFC, PCC, precuneus, cerebellum                                                                                          | Craving (scanner) ↑: caudate body, pallidum, parahippocampus, amygdala, thalamus, vIPFC, OFC, dACC, dmPFC, PCC, temporal pole, cerebellum<br>Craving (pre/post) ↑: insula, IPL, motor, sensory, visual, auditory<br>Withdrawal ↑: insula, premotor, dACC, IPL, temporal pole, sensory, visual, auditory<br>CAN metabolites ↑: visual | USA         | 38 | no  |
| Roberts 2013  | CAN<br>MD<br>MA | uri-  | 30<br>MD<br>MA<br>25<br>CAN<br>30<br>HC | Drug Cues, IAPS (negative) | n.a. | G*T(MDMA ↓)(drug cues): speed<br>HC> MDMA: accuracy | MDMA > HC: dIPFC, visual<br>G*T (↓MDMA) (drug cues): aPFC<br>G*T(↑MDMA) (drug cues): vIPFC/dIPFC, visual<br>G*T(↑MDMA)(negative): aPFC<br>G*T(↓MDMA)(negative): vIPFC/dIPFC, visual                           | n.s.                                                                                                                                                                                                                                                                                                                                 | Ireland     | 40 | no  |
| Bell 2014a    | COC             | parR  | A 20<br>HC<br>19                        | Drug Cues SST              | n.a. | A>HC:<br>↑craving                                   | n.s.                                                                                                                                                                                                          | n.s.                                                                                                                                                                                                                                                                                                                                 | USA         | 0  | no  |
| Ray 2015      | COC             | uri-  | A 20<br>HC<br>17                        | Drug Cues                  | n.a. | A>HC:<br>↑craving                                   | G*T (A ↑) (Drug): ventral striatum, dorsal striatum, hippocampus, parahippocampus, amygdala, thalamus, insula, vIPFC, dIPFC, premotor, SMA, OFC, aPFC, sgACC, rACC, dACC, dmPFC, PCC, IPL, SPL, temporal pole | n.a.                                                                                                                                                                                                                                                                                                                                 | USA         | 25 | no  |
| Kober 2016    | COC             | n.a.  | A 30<br>HC<br>45                        | Drug/Sad Videos            | n.a. | A>HC:<br>↑craving                                   | G*T (A ↑)( Drug)(Early): rACC<br>G*T (A ↑)(Drug)(Late): dmPFC, dACC                                                                                                                                           | n.a.                                                                                                                                                                                                                                                                                                                                 | USA         | 40 | YES |
| Li 2012       | HER             | uri-  | A 24<br>HC<br>20                        | Drug Cues                  | n.a. | A>HC:<br>↑craving                                   | G*T (A ↑) (Drug): NAc, caudate, putamen, hippocampus, parahippocampus, amygdala, thalamus, vIPFC, dIPFC, premotor, SMA, vmPFC, OFC, sgACC, rACC, dACC, dmPFC, PCC                                             | n.s.                                                                                                                                                                                                                                                                                                                                 | China       | 0  | no  |
| Wang 2014     | HER             | met h | A 30<br>HC<br>17                        | Drug Cues                  | MMT  | n.s.                                                | G*T (A ↑) (Drug): parahippocampus, thalamus, vIPFC, SMA, dACC, precuneus, cerebellum                                                                                                                          | MMT ↓: caudate                                                                                                                                                                                                                                                                                                                       | China       | 0  | no  |

|                          |              |          |                           |                              |      |                                    |                                                                                                                                                                                                                                               |                                                                                                                                                  |         |    |    |
|--------------------------|--------------|----------|---------------------------|------------------------------|------|------------------------------------|-----------------------------------------------------------------------------------------------------------------------------------------------------------------------------------------------------------------------------------------------|--------------------------------------------------------------------------------------------------------------------------------------------------|---------|----|----|
| Tabatabaei-Jafari 2014   | HER          | urimet h | A 20 A (MMT) 20 HC 20     | Drug Cues                    | MMT  | n.s.                               | A>HC: <b>vIPFC, rACC, dACC</b><br>A(MMT)>HC: visual, cerebellum                                                                                                                                                                               | A>A(MMT) ↑: <b>vIPFC</b> , auditory                                                                                                              | Iran    | 0  | no |
| Li 2015                  | HER          | met h    | A 44 HC 20                | Drug Cues                    | MMT  | n.s.                               | G*T (A ↑) (Drug): <b>NAC, caudate, putamen, pallidum, parahippocampus, dIPFC, OFC, rACC, dACC, precuneus, SPL, IPL, temporal pole, visual, cerebellum</b>                                                                                     | Relapsers>Non-relapsers ↑: <b>NAC, cerebellum</b>                                                                                                | China   | 0  | no |
| Yin 2012                 | MET H        | abs      | A 26 HC 26                | Drug Cues                    | n.a. | n.a.                               | n.s.                                                                                                                                                                                                                                          | n.a.                                                                                                                                             | China   | 46 | no |
| Vollstädt-Klein 2011     | NIC          | use      | A 22 HC 21                | Drug Cues                    | n.a. | n.a.                               | n.s.                                                                                                                                                                                                                                          | Addiction Severity ↓: <b>putamen, hippocampus, parahippocampus, amygdala, thalamus, dIPFC, premotor, PCC, precuneus, SPL, IPL, motor, visual</b> | Germany | 0  | no |
| Yalachkov 2013           | NIC          | use      | A 15 HC 15                | Drug Cues                    | n.a. | A>HC: ↑Haptic Drug Cue Recognition | HC>A: <b>vIPFC, dIPFC, SMA, visual</b><br>G*T (A ↓)(Drug): visual                                                                                                                                                                             | n.a.                                                                                                                                             | Germany | 53 | no |
| Hong 2017                | NIC          | n.a.     | A 15 HC 15                | Drug/Aversive Videos         | n.a. | n.a.                               | A>HC (Drug): <b>sgACC, temporal pole</b><br>HC>A (Drug): premotor<br>A>HC (negative): premotor<br>HC>A: (negative): insula, dIPFC, sgACC, dACC, precuneus, auditory, cerebellum                                                               | NIC Dependence ↑: <b>sgACC</b>                                                                                                                   | Korea   | 0  | no |
| <b>Reward processing</b> |              |          |                           |                              |      |                                    |                                                                                                                                                                                                                                               |                                                                                                                                                  |         |    |    |
| Romanczuk-Seifert h 2015 | ALC          | abs      | A 15 HC 17                | MID                          | n.a. | n.s.                               | n.s.                                                                                                                                                                                                                                          | n.s.                                                                                                                                             | Germany | 0  | no |
| Grodin 2016              | ALC          | abs      | A 17 HC 17                | MID                          | n.a. | A>HC: ↑misses, errors              | A>HC (Anticipation) (Low effort): <b>NAC, dorsal caudate</b><br>A>HC (Anticipation)(Unpredictable effort): <b>NAC, dorsal caudate, SMA, precuneus, SPL, visual, auditory, cerebellum</b><br>G*T(↓A)(Loss)(High effort): <b>dorsal caudate</b> | n.a.                                                                                                                                             | USA     | 35 | no |
| Alexander 2015           | ALC CAN POLY | use      | ALC 3 CAN 7 POLY 15 HC 24 | Incentive Change-Signal Task | n.a. | HC>A: Faster Go responses          | n.s.                                                                                                                                                                                                                                          | n.a.                                                                                                                                             | USA     | 48 | no |

|                        |          |         |                      |                                        |                 |                                                                              |                                                                                                                                                                                                                                                                                                       |                                                                                                   |         |      |    |
|------------------------|----------|---------|----------------------|----------------------------------------|-----------------|------------------------------------------------------------------------------|-------------------------------------------------------------------------------------------------------------------------------------------------------------------------------------------------------------------------------------------------------------------------------------------------------|---------------------------------------------------------------------------------------------------|---------|------|----|
| Murphy 2017            | ALC POLY | abs     | ALC 18 POLY 32 HC 33 | MID                                    | n.a.            | n.s.                                                                         | n.s.                                                                                                                                                                                                                                                                                                  | n.a.                                                                                              | UK      | n.a. | no |
| Yip 2014               | CAN      | Abs/use | A 20 HC 20           | MID                                    | n.a.            | n.s.                                                                         | HC>A (Loss Anticipation): <b>dIPFC, vIPFC, SMA</b><br>HC>A (Win): <b>SMA, SPL</b> , motor, sensory<br>A>HC (Loss): <b>caudate, putamen</b> , pallidum, thalamus, <b>hippocampus, SPL, IPL</b> , sensory, auditory                                                                                     | n.a.                                                                                              | USA     | 0    | no |
| Enzi 2015              | CAN      | abs     | A 15 HC 15           | MID                                    | n.a.            | n.s.                                                                         | n.s.                                                                                                                                                                                                                                                                                                  | n.s.                                                                                              | Germany | 0    | no |
| Jia 2011               | COC      | use     | A 20 HC 20           | MID                                    | CBT, Incentives | n.s.                                                                         | n.s.                                                                                                                                                                                                                                                                                                  | n.s.                                                                                              | USA     | 40   | no |
| Hester 2013            | COC      | parR    | A 15 HC 15           | Go/NoGo with punishment                | n.a.            | HC>A (loss): accuracy, learning<br>G*T(↓A) (loss): speed, post-error slowing | n.s.                                                                                                                                                                                                                                                                                                  | n.s.                                                                                              | USA     | 13   | no |
| Worhunsky 2014         | COC      | uri-    | A 24 HC 24           | Simulated Slot Machine                 | n.a.            | n.s.                                                                         | A>HC (Win anticipation): <b>putamen, caudate, hippocampus, insula, dACC, vIPFC, dIPFC, SMA</b> , dmPFC, visual, auditory<br>A>HC (near miss): dmPFC                                                                                                                                                   | n.a.                                                                                              | USA     | 33   | no |
| Balodis 2016           | COC      | uri-    | A 29 HC 28           | MID                                    | CBT             | n.a.                                                                         | A>HC (Win Anticipation): <b>vIPFC</b><br>A>HC (Loss Anticipation): <b>vIPFC</b> , auditory                                                                                                                                                                                                            | Treatment ↑: SN, <b>caudate</b> , lentiform nucleus, thalamus, <b>PCC</b> , precuneus, cerebellum | USA     | 26   | no |
| Bischoff-Grethe 2017   | METH     | uri-    | A 17 HC 23           | Probabilistic Feedback Expectancy Task | n.a.            | n.s.                                                                         | HC>A (Anticipation): <b>dorsal striatum</b> , thalamus, <b>insula, dIPFC</b> , premotor, <b>dACC</b> , IPL sensory, visual<br>G*T (Anticipation): <b>vIPFC, dACC, IPL, SPL</b><br>A>HC (Outcome): <b>parahippocampus</b> , thalamus, <b>dIPFC, SMA, dACC</b> , visual<br>G*T (Outcome): motor, visual | n.s.                                                                                              | USA     | 0    | no |
| Rose 2013              | NIC      | use     | A 28 HC 28           | MID                                    | 20 mg NIC       | n.s.                                                                         | n.s.                                                                                                                                                                                                                                                                                                  | G*T (A ↑)(NIC administration): <b>PCC</b><br>A (NIC administration): premotor                     | USA     | 54   | no |
| <b>Decision Making</b> |          |         |                      |                                        |                 |                                                                              |                                                                                                                                                                                                                                                                                                       |                                                                                                   |         |      |    |
| Arcurio 2015           | ALC      | abs     | A 15 HC 16           | Decision to Drink Task                 | n.a.            | A>HC: Endorsed alcohol despite high risk                                     | A>HC (Endorsed Alcohol): SN, dorsal striatum, anterior insula, vIPFC, dIPFC, SMA, visual, cerebellum<br>G*T (A ↑)(Endorsed Alcohol): anterior insula, vIPFC, premotor, IPL, visual, cerebellum                                                                                                        | n.a.                                                                                              | USA     | 100  | no |

|                |     |          |                                                   |                                  |      |                                                                                                          |                                                                                                                                                                                                                                                                                                                                                                                                                                                                  |                                                                                                                                                                                                                                                                                                                                             |             |    |    |
|----------------|-----|----------|---------------------------------------------------|----------------------------------|------|----------------------------------------------------------------------------------------------------------|------------------------------------------------------------------------------------------------------------------------------------------------------------------------------------------------------------------------------------------------------------------------------------------------------------------------------------------------------------------------------------------------------------------------------------------------------------------|---------------------------------------------------------------------------------------------------------------------------------------------------------------------------------------------------------------------------------------------------------------------------------------------------------------------------------------------|-------------|----|----|
| Beylergil 2017 | ALC | abs      | A 34<br>HC<br>26                                  | Two Choice<br>Prediction<br>Task | n.a. | HC>A: Learned<br>reward<br>contingencies,<br>correct choices,<br>loss contingent<br>behavioral<br>change | HC>A (Negative Prediction Error): <b>dIPFC</b><br>HC>A (Positive Prediction Error): <b>dIPFC</b> , premotor, FEF, <b>IPL</b>                                                                                                                                                                                                                                                                                                                                     | n.a.                                                                                                                                                                                                                                                                                                                                        | Germany     | 0  | no |
| Wesley 2011    | CAN | abs      | A 16<br>HC<br>16                                  | IGT                              | n.a. | HC>A: fewer<br>losses                                                                                    | HC>A (outcome): <b>dmPFC</b> , <b>dACC</b><br>HC>A (Loss): <b>SMA</b> , <b>dACC</b> , <b>dmPFC</b> , <b>precuneus</b> , <b>SPL</b> , <b>cerebellum</b>                                                                                                                                                                                                                                                                                                           | n.a.                                                                                                                                                                                                                                                                                                                                        | USA         | 63 | no |
| Cousijn 2013b  | CAN | abs      | A 32<br>HC<br>41                                  | IGT                              | n.a. | n.s.                                                                                                     | G*T (A ↑) (Win): <b>insula</b> , <b>OFC</b> , auditory                                                                                                                                                                                                                                                                                                                                                                                                           | Weekly Use ↑: <b>dorsal caudate</b> ,<br><b>insula</b> , <b>vIPFC</b><br>Weekly Use follow-up: ↑ <b>vIPFC</b> ,<br><b>dIPFC</b> , <b>aPFC</b> , visual, auditory                                                                                                                                                                            | Netherlands | 34 | no |
| Gowin 2017     | COC | uri-     | A 29<br>HC<br>40                                  | RGT                              | n.a. | G*T(A↑): Risky<br>Choice after<br>Loss                                                                   | A>HC (Decision): motor, auditory<br>G*T (A ↓) (Decision) (High Risk): <b>ventral striatum</b> , <b>SMA</b> ,<br>motor, visual, auditory<br>A>HC (Outcome): thalamus, <b>PCC</b> , <b>IPL</b> , visual, auditory,<br>cerebellum<br>HC>A (Outcome): sensory<br>G*T (A ↓)(High Loss): <b>ventral striatum</b> , <b>dorsal striatum</b> ,<br>thalamus, <b>insula</b> , <b>vIPFC</b> , <b>dIPFC</b> , premotor, <b>sgACC</b> , <b>precuneus</b> ,<br>visual, auditory | Lifetime COC Use ↑ : <b>rACC</b><br>Time since last use ↑ : <b>dACC</b>                                                                                                                                                                                                                                                                     | USA         | 13 | no |
| Meade 2017     | COC | abs      | A +<br>HIV<br>18<br>A 19<br>HIV<br>19<br>HC<br>17 | ICT                              | n.a. | n.a.                                                                                                     | G*T(A ↓) (Decision)(Difficult): <b>insula</b> , <b>vIPFC</b> , <b>dIPFC</b> , premotor,<br><b>IPL</b> , motor, sensory, visual                                                                                                                                                                                                                                                                                                                                   | n.a.                                                                                                                                                                                                                                                                                                                                        | USA         | 37 | no |
| Worhunsky 2017 | COC | uri-     | A 18<br>HC<br>27                                  | Loss Chase<br>Task               | n.a. | n.s.                                                                                                     | G*T(A↓)(Loss): ventral + dorsal <b>putamen/caudate/pallidum</b> ,<br><b>amygdala</b>                                                                                                                                                                                                                                                                                                                                                                             | n.s.                                                                                                                                                                                                                                                                                                                                        | USA         | 39 | no |
| Gradin 2014    | HER | met<br>h | A 30<br>HC<br>23                                  | Reward/Loss<br>Learning<br>Task  | MMT  | A>HC: speed<br>decision                                                                                  | A>HC (Win Anticipation): auditory<br>HC>A (Loss Anticipation): <b>insula</b> , <b>vIPFC</b><br>HC>A (Win): <b>dorsal caudate</b> , <b>precuneus</b> , <b>IPL</b> , <b>SPL</b> , visual,<br>cerebellum<br>HC>A (Avoided Loss): <b>ventral striatum</b> , <b>dorsal caudate</b> ,<br><b>parahippocampus</b> , <b>dIPFC</b> , <b>SMA</b> , auditory, cerebellum                                                                                                     | MMT ↑ (Win Anticipation): <b>vIPFC</b> ,<br><b>precuneus</b><br>MMT ↑ (Loss Anticipation):<br>thalamus, <b>OFC</b> , <b>IPL</b><br>MMT ↓ (Reward):<br><b>parahippocampus</b> , <b>aPFC</b> , <b>precuneus</b> ,<br><b>IPL</b> , auditory<br>MMT ↓ (Avoided Loss):<br><b>parahippocampus</b> , thalamus, <b>aPFC</b> ,<br>visual, cerebellum | UK          | 0  | no |

|                           |       |         |                           |                                |                    |                                    |                                                                                                                                                                                                                                                        |                                      |         |      |    |
|---------------------------|-------|---------|---------------------------|--------------------------------|--------------------|------------------------------------|--------------------------------------------------------------------------------------------------------------------------------------------------------------------------------------------------------------------------------------------------------|--------------------------------------|---------|------|----|
| Gowin 2014                | MET H | abs     | A 68 HC 40                | RGT                            | n.a.               | n.s.                               | A>HC (Decision): parahippocampus, visual, auditory, cerebellum<br>HC>A (Decision): rACC, auditory<br>G*T: caudate, premotor, FEF, SMA, dACC, PCC, IPL, motor, auditory<br>G*T (A ↓) (High win): rACC                                                   | n.s.                                 | USA     | 22   | no |
| Stewart 2014              | MET H | uri-    | A 20 HC 22                | Two Choice Prediction Task     | aversive breathing | HC>A: Adaptive behavior after loss | HC>A : thalamus, anterior insula, vIPFC, aPFC, dmPFC, IPL, sensory, visual, auditory, cerebellum<br>G*T (↓A) (aversive breathing): ventral striatum, thalamus, posterior insula, dACC, PCC, IPL, sensory, visual<br>G*T (A ↓)(Loss): dACC, PCC         | n.a.                                 | USA     | 0    | no |
| Kohno 2014                | MET H | use     | A 25 HC 27                | BART                           | n.a.               | HC>A: wins                         | HC>A (Decision)(High Risk): dlPFC<br>G*T( A ↑) (Win): caudate, anterior insula                                                                                                                                                                         | n.a.                                 | USA     | 52   | no |
| Koester 2013              | STIM  | abs     | A 15 cU 18 HC 15          | Gambling                       | n.a.               | A, cU>HC: high risk choices        | HC,cU>A (Decision)(High Reward): motor<br>A, cU>HC (Decision)(High Risk): visual                                                                                                                                                                       | n.a.                                 | Germany | 33   | no |
| Tanabe 2013               | STIM  | rem     | A 32 HC 30                | IGT                            | n.a.               | G*T (A ↓): monetary gain           | HC>A (Prediction Error): ventral striatum, insula, thalamus, OFC, auditory                                                                                                                                                                             | n.s.                                 | USA     | 41   | no |
| Yamamoto 2014             | SUB   | rem     | A 37 HC 43                | IGT                            | n.a.               | HC>A: risk avoidance               | A>HC (Decision): ventral striatum, dorsal striatum, pallidum, thalamus, insula, dlPFC, SMA, OFC, dACC, dmPFC, precuneus, SPL, IPL, visual, auditory, cerebellum<br>HC>A (Outcome): VTA, ventral striatum, dorsal putamen, amygdala, dACC, IPL, sensory | n.a.                                 | USA     | n.a. | no |
| <b>Inhibitory Control</b> |       |         |                           |                                |                    |                                    |                                                                                                                                                                                                                                                        |                                      |         |      |    |
| Bednarski 2012            | ALC   | abs     | A 20 HC 21                | SST                            | n.a.               | n.s.                               | HC>A (speeded responses): dorsal putamen, hippocampal region, vIPFC                                                                                                                                                                                    | n.s.                                 | USA     | 45   | no |
| Schulte 2012              | ALC   | par R   | A 18 HC 17                | Stroop Match to Sample         | n.a.               | n.s.                               | A>HC (conflict): midbrain(SN/STN), hypothalamus<br>A>HC (no-conflict): midbrain(SN/STN), hypothalamus, PCC, precuneus, visual<br>A>HC (conflict with repetition): PCC, visual<br>HC>A (conflict with switching): hippocampus                           | n.s.                                 | USA     | 0    | no |
| Fryer 2013                | ALC   | abs/rem | cA 16 prA 15 frA 13 HC 20 | picture Go/NoGo (alcohol cues) | n.a.               | n.s.                               | HC,frA>prA,cA (conflict)(drug cue): IPL, sensory<br>frA>HC>prA,cA (conflict) (drug cue): dACC                                                                                                                                                          | craving (↑A): rACC/dmPFC, cerebellum | USA     | 23   | no |

|                         |             |                          |                            |                        |              |                                                        |                                                                                                                                                                                          |                                                                                                                                                                                                                                                  |             |      |    |
|-------------------------|-------------|--------------------------|----------------------------|------------------------|--------------|--------------------------------------------------------|------------------------------------------------------------------------------------------------------------------------------------------------------------------------------------------|--------------------------------------------------------------------------------------------------------------------------------------------------------------------------------------------------------------------------------------------------|-------------|------|----|
| Schmal 2013             | ALC         | uri-                     | A 16<br>HC<br>16           | SST                    | n.a.         | n.s.                                                   | n.s.                                                                                                                                                                                     | n.s.                                                                                                                                                                                                                                             | Netherlands | 0    | no |
| Sjoerds 2014b           | ALC         | abs                      | A 31<br>HC<br>16           | SST                    | n.a.         | n.s.                                                   | n.s.                                                                                                                                                                                     | n.s.                                                                                                                                                                                                                                             | Netherlands | 45   | no |
| Hu 2015                 | ALC         | uri-                     | A 24<br>HC<br>70           | SST                    | n.a.         | HC>A: Faster Go responses<br>HC>A: Greater Go Accuracy | HC>A (conflict anticipation): <b>caudate, dACC, dlPFC, hippocampus, dmPFC</b> , temporal pole, motor, visual<br>A>HC (conflict anticipation): <b>IPL, SMA</b>                            | ALC use last month ↑: thalamus, cerebellum                                                                                                                                                                                                       | USA         | 25   | no |
| Czapla 2017             | ALC         | abs                      | A 19<br>HC<br>21           | Drug Cue Go/NoGo       | detox        | n.s.                                                   | A>HC (drug): visual, cerebellum<br>A>HC (conflict) (any cue): <b>vmPFC, rACC, dACC, dmPFC</b><br>A>HC (conflict)(drug cue): visual<br>HC>A (conflict) (no drug cue): <b>IPL, sensory</b> | n.a.                                                                                                                                                                                                                                             | Germany     | 10   | no |
| Murphy 2017             | ALC<br>POLY | abs                      | ALC 18<br>POLY 25<br>HC 31 | Go/NoGo                | n.a.         | n.s.                                                   | ALC>HC,POLY: midbrain                                                                                                                                                                    | n.s.                                                                                                                                                                                                                                             | UK          | n.a. | no |
| Kober 2014              | CAN         | use                      | A 20<br>HC<br>20           | cwStroop               | n.a.         | n.s.                                                   | HC>A (conflict): <b>VTA, ventral/dorsal striatum, parahippocampus/amygdala, thalamus, dlPFC</b>                                                                                          | abstinence during treatment ↑: <b>dACC, PCC, IPL</b> , visual<br>abstinence 1-year follow-up ↑: <b>ventral striatum, vlPFC, sgACC, PCC</b> , temporal pole, visual, cerebellum<br>abstinence 1-year follow-up ↓: <b>anterior insula, putamen</b> | USA         | 0    | no |
| Zimmermann 2017         | CAN         | abs                      | A 23<br>HC<br>20           | Reappraisal of Emotion | n.a.         | HC>A: downregulation emotion                           | A>HC (regulation): premotor,SMA, sensory, gustatory                                                                                                                                      | n.s.                                                                                                                                                                                                                                             | Germany     | 0    | no |
| Tomasi 2010             | COC         | use                      | A 20<br>HC<br>20           | DW Stroop              | n.a.         | n.s.                                                   | HC>A: <b>caudate, thalamus, dlPFC, premotor, rACC</b>                                                                                                                                    | n.a.                                                                                                                                                                                                                                             | USA         | 15   | no |
| Barros-Loscertales 2011 | COC         | uri-                     | A 16<br>HC<br>16           | counting Stroop        | n.a.         | HC>A: speed neutral trials                             | HC>A: <b>vlPFC, IPL</b> , auditory                                                                                                                                                       | n.s.                                                                                                                                                                                                                                             | Spain       | 0    | no |
| Albein-Urios 2012       | COC         | uri-                     | A 17<br>HC<br>18           | Reappraisal of Emotion | n.a.         | n.s.                                                   | G*T (A ↓): thalamus, <b>insula, vlPFC, dlPFC, PCC, IPL, SPL</b> , visual, cerebellum                                                                                                     | n.a.                                                                                                                                                                                                                                             | Spain       | 6    | no |
| Moeller 2012            | COC         | use/<br>abs/<br>par<br>R | A 33<br>HC<br>20           | cwStroop               | 20 mg<br>MPH | n.s.                                                   | A>HC (conflict): visual, cerebellum                                                                                                                                                      | n.a.                                                                                                                                                                                                                                             | USA         | 15   | no |

|                      |          |             |                                             |                                   |                                       |                                                                                           |                                                                                                |                                                                                                                                                                                                                                                                                                                          |                    |    |     |
|----------------------|----------|-------------|---------------------------------------------|-----------------------------------|---------------------------------------|-------------------------------------------------------------------------------------------|------------------------------------------------------------------------------------------------|--------------------------------------------------------------------------------------------------------------------------------------------------------------------------------------------------------------------------------------------------------------------------------------------------------------------------|--------------------|----|-----|
| Worh<br>nsky<br>2013 | COC      | abs         | A 20<br>HC<br>20                            | cwStroop                          | CBT+<br>cognit<br>ive<br>enhan<br>cer | A>HC: error<br>rate                                                                       | n.s.                                                                                           | previous CBT (↓A): anterior insula,<br>dACC<br>weeks current CBT (↓A): ventral<br>putamen, anterior insula, dACC<br>current abstinence (↑A): dorsal<br>caudate, thalamus, amygdala,<br>parahippocampus, vIPFC<br>current abstinence (↓A): vmPFC,<br>sgACC<br>depression (↓A): vmPFC, sgACC<br>ALC use (↓A): vmPFC, sgACC | USA                | 40 | no  |
| Hester<br>2013       | COC      | par<br>R    | A 15<br>HC<br>15                            | Go/NoGo<br>with<br>punishmen<br>t | n.a.                                  | HC>A (loss):<br>accuracy,<br>learning<br>G*T(↓A) (loss):<br>speed, post-<br>error slowing | n.s.                                                                                           | n.s.                                                                                                                                                                                                                                                                                                                     | USA                | 13 | no  |
| Bell<br>2014a        | COC      | par<br>R    | A 20<br>HC<br>19                            | Drug Cues<br>SST                  | n.a.                                  | A>HC:<br>↑craving                                                                         | n.s.                                                                                           | n.s.                                                                                                                                                                                                                                                                                                                     | USA                | 0  | no  |
| Bell<br>2014b        | COC      | par<br>R    | A 27<br>HC<br>45                            | Go/NoGo                           | n.a.                                  | n.s.                                                                                      | n.s.                                                                                           | n.s.                                                                                                                                                                                                                                                                                                                     | USA                | 11 | no  |
| Moelle<br>r<br>2014a | COC      | use/<br>abs | A 33<br>HC<br>20                            | cwStroop                          | n.a.                                  | n.s.                                                                                      | A>HC (conflict): visual, cerebellum<br>HC>A (conflict): dIPFC<br>HC>A (error): vIPFC, IPL      | n.a.                                                                                                                                                                                                                                                                                                                     | USA                | 0  | no  |
| Moelle<br>r<br>2014b | COC      | use/<br>abs | A 21<br>HC<br>17                            | cwStroop                          | n.a.                                  | n.s.                                                                                      | A>HC (error): dIPFC<br>HC>A (conflict): IPL<br>A>HC (conflict): hippocampus                    | n.s.                                                                                                                                                                                                                                                                                                                     | USA                | 0  | no  |
| Meade<br>2017        | COC      | abs         | AHIV<br>18<br>A 19<br>HIV<br>19<br>HC<br>17 | ICT                               | n.a.                                  | n.a.                                                                                      | G*T(A ↓) (Decision)(Difficult): insula, vIPFC, dIPFC, premotor,<br>IPL, motor, sensory, visual | n.a.                                                                                                                                                                                                                                                                                                                     | USA                | 37 | no  |
| Moelle<br>r 2014c    | COC      | use/<br>abs | A 16<br>HC<br>15                            | cwStroop                          | 20 mg<br>MPH                          | n.s.                                                                                      | A>HC (conflict): insula, dIPFC, visual, cerebellum                                             | n.a.                                                                                                                                                                                                                                                                                                                     | USA                | 6  | no  |
| Robert<br>s 2010     | MD<br>MA | abs         | A 20<br>HC<br>20                            | Go/NoGo                           | n.a.                                  | n.s.                                                                                      | A>HC (conflict): vIPFC, dIPFC, premotor, IPL<br>A>HC (error): dmPFC, PCC, visual               | n.s.                                                                                                                                                                                                                                                                                                                     | Ireland            | 50 | YES |
| Jan<br>2014          | MET<br>H | use         | A 15<br>HC<br>18                            | cwStroop                          | 18 mg<br>MPH                          | HC>A: speed                                                                               | A>HC (conflict): premotor/FEF<br>G*T (↑A) (conflict): IPL                                      | n.a.                                                                                                                                                                                                                                                                                                                     | New<br>Zealan<br>d | 27 | no  |



|                                    |      |      |                              |                                         |                         |                                                                    |                                                                                                                                                                                                                                                                                                                                                                                                                                                                                                                                                            |                                            |                 |    |     |
|------------------------------------|------|------|------------------------------|-----------------------------------------|-------------------------|--------------------------------------------------------------------|------------------------------------------------------------------------------------------------------------------------------------------------------------------------------------------------------------------------------------------------------------------------------------------------------------------------------------------------------------------------------------------------------------------------------------------------------------------------------------------------------------------------------------------------------------|--------------------------------------------|-----------------|----|-----|
| Luijten<br>2013                    | NIC  | use  | A 25<br>HC<br>25             | Go/NoGo                                 | 2 mg<br>Halop<br>eridol | A>HC (NoGo):<br>error<br>HC>A: speed                               | HC>A (conflict): parahippocampus, aPFC, dACC<br>A>HC (conflict): PCC                                                                                                                                                                                                                                                                                                                                                                                                                                                                                       | n.a.                                       | Netherl<br>ands | 28 | no  |
| Carroll<br>2015                    | NIC  | use  | A 24<br>HC<br>20             | Flanker<br>task                         | n.a.                    | A>HC: miss rate                                                    | n.s.                                                                                                                                                                                                                                                                                                                                                                                                                                                                                                                                                       | n.s.                                       | USA             | 50 | no  |
| Morein<br>-Zamir<br>2013           | STIM | use  | A 32<br>HC<br>41             | SST                                     | n.a.                    | HC>A: speed                                                        | n.s.                                                                                                                                                                                                                                                                                                                                                                                                                                                                                                                                                       | n.s.                                       | UK              | 6  | no  |
| Smith<br>2013                      | STIM | use  | A 42<br>HC<br>47             | cwStroop                                | n.a.                    | HC>A: speed                                                        | n.s.                                                                                                                                                                                                                                                                                                                                                                                                                                                                                                                                                       | n.s.                                       | UK              | 5  | no  |
| Smith<br>2014                      | STIM | use  | A 41<br>cU<br>26<br>HC<br>47 | cocaine<br>Stroop                       | n.a.                    | A>HC: error<br>rate,<br>attentional bias<br>cocaine<br>HC>A: speed | A,HC>cU (conflict): OFC, PCC                                                                                                                                                                                                                                                                                                                                                                                                                                                                                                                               | n.s.                                       | UK              | 12 | no  |
| Harle<br>2014                      | STIM | uri- | A<br>158<br>HC<br>47         | SST                                     | n.a.                    | A>HC (long stop<br>signal delay):<br>error                         | HC>A: parahippocampus, PCC, auditory<br>HC>A (conflict anticipation): dorsal caudate, insula, dACC,<br>vIPFC, dlPFC, parahippocampus,<br>HC>A (prediction error): aPFC, dACC, insula<br>HC>A (inhibitory success): parahippocampus<br>HC>A (stop success): vIPFC, precuneus<br>A>HC (attempted stop): dACC, SPL, sensory                                                                                                                                                                                                                                   | reward dependence ( $\downarrow$ A): vIPFC | USA             | 39 | YES |
| <b>Social-Emotional Processing</b> |      |      |                              |                                         |                         |                                                                    |                                                                                                                                                                                                                                                                                                                                                                                                                                                                                                                                                            |                                            |                 |    |     |
| Gilman<br>2010                     | ALC  | abs  | A 15<br>HC<br>15             | IAPS<br>(negative +<br>positive)        | n.a.                    | n.s.                                                               | HC>A (Passive Viewing): precuneus<br>A>HC (Non-emotional task): putamen, insula, vIPFC, dlPFC,<br>premotor, SMA, sensory<br>A>HC (Emotional task): putamen, thalamus, insula, vIPFC,<br>premotor, SMA, IPL, sensory<br>HC>A (Passive Viewing)(Positive): parahippocampus<br>HC>A (Non-emotional task)(Positive): IPL<br>A>HC (Non-emotional task)(Positive): parahippocampus,<br>dlPFC<br>A>HC (Non-emotional task)(Negative): aPFC, SMA<br>A>HC (Emotional task)(Positive): thalamus, SMA, auditory<br>A>HC (Emotional task)(Negative): insula, dACC, SMA | n.a.                                       | USA             | 53 | no  |
| Maura<br>ge<br>2012                | ALC  | abs  | A 22<br>HC<br>22             | Cyberball<br>task (social<br>exclusion) | n.a.                    | n.s.                                                               | HC>A (being excluded): vIPFC, dACC<br>A>HC (being excluded): mid insula<br>A>HC (being included): dACC, parahippocampus                                                                                                                                                                                                                                                                                                                                                                                                                                    | n.a.                                       | Belgiu<br>m     | 0  | no  |

|                 |                 |      |                                                   |                                                         |                                    |                                                                                                       |                                                                                                                                                                                                                                                                                                                                                                                                                                                         |                                                                                                                                                                                               |         |    |    |
|-----------------|-----------------|------|---------------------------------------------------|---------------------------------------------------------|------------------------------------|-------------------------------------------------------------------------------------------------------|---------------------------------------------------------------------------------------------------------------------------------------------------------------------------------------------------------------------------------------------------------------------------------------------------------------------------------------------------------------------------------------------------------------------------------------------------------|-----------------------------------------------------------------------------------------------------------------------------------------------------------------------------------------------|---------|----|----|
| Lee<br>2013     | ALC             | abs  | A 17<br>C 25                                      | Drug Cues<br>IAPS<br>(negative +<br>positive)           | n.a.                               | A>HC (Drug<br>Cue): ↑<br>craving,<br>positive<br>emotion<br>HC>A (Positive):<br>↓ positive<br>emotion | A>HC (Drug): IPL<br>A>HC (Negative): visual                                                                                                                                                                                                                                                                                                                                                                                                             | n.s.                                                                                                                                                                                          | Korea   | 29 | no |
| Seo<br>2013     | ALC             | abs  | A 30<br>HC<br>30                                  | Drug<br>Script/<br>Stress<br>Script                     | in<br>patien<br>t<br>treat<br>ment | A>HC:<br>↑craving<br>G*T (A ↑)(Drug<br>Cue): ↑anxiety                                                 | HC>A (Drug): anterior insula, premotor, FEF, vmPFC, dmPFC,<br>rACC, OFC, PCC, precuneus, IPL, temporal pole, auditory,<br>visual, cerebellum<br>HC>A (Stress): anterior insula, premotor, FEF, vmPFC, rACC,<br>OFC, dmPFC, PCC, precuneus, IPL, temporal pole, auditory,<br>visual, cerebellum<br>A>HC (Neutral): vmPFC, rACC, PCC, precuneus, visual,<br>cerebellum<br>HC>A (Neutral): anterior insula, premotor, FEF, OFC, IPL,<br>temporal pole, IPL | Relapse (Neutral) ↑: ventral<br>striatum, vmPFC, rACC<br>Relapse (Stress) ↓: posterior insula,<br>vlPFC, vmPFC, rACC, PCC, auditory<br>Craving ↑: ventral striatum, vmPFC,<br>rACC, precuneus | USA     | 22 | no |
| Kim<br>2014     | ALC             | abs  | A 38<br>HC<br>26                                  | Drug/Avers<br>ive Videos                                | n.a.                               | A>HC:<br>↑craving                                                                                     | A>HC (Drug): aPFC<br>HC>A (Drug): visual<br>A>HC (Negative): visual<br>HC>A (Negative): hippocampus, dlPFC, auditory                                                                                                                                                                                                                                                                                                                                    | n.s.                                                                                                                                                                                          | Korea   | 29 | no |
| Ford<br>2014    | CAN             | use  | A +<br>MDD<br>14<br>A 15<br>MDD<br>15<br>HC<br>17 | preferred<br>music<br>(passive<br>listening)            | n.a.                               | n.s.                                                                                                  | n.s.                                                                                                                                                                                                                                                                                                                                                                                                                                                    | days used last month ↑: OFC,<br>sgACC, rACC, dACC                                                                                                                                             | Canada  | 33 | no |
| Wesley<br>2016  | CAN             | use  | A 16<br>HC<br>17                                  | IAPS<br>(negative +<br>positive)<br>(rating<br>emotion) | n.a.                               | n.s.                                                                                                  | HC>A (emotion): vmPFC/dmPFC, sgACC/rACC                                                                                                                                                                                                                                                                                                                                                                                                                 | n.a.                                                                                                                                                                                          | USA     | 47 | no |
| Roberts<br>2013 | CAN<br>MD<br>MA | uri- | MD<br>MA<br>30<br>CAN<br>25<br>HC<br>30           | Drug Cues,<br>IAPS<br>(negative)                        | n.a.                               | G*T(<br>MDMA ↓)(drug<br>cues): speed<br>HC> MDMA:<br>accuracy                                         | MDMA > HC: dlPFC, visual<br>G*T (↓MDMA) (drug cues): aPFC<br>G*T( ↑MDMA) (drug cues): vlPFC/dlPFC, visual<br>G*T( ↑MDMA)(negative): aPFC<br>G*T( ↓MDMA)(negative): vlPFC/dlPFC, visual                                                                                                                                                                                                                                                                  | n.s.                                                                                                                                                                                          | Ireland | 40 | no |

|                  |          |          |                  |                                                                              |                                                                   |                                                                                                                                         |                                                                                                                                                                     |                                                                                                                                                   |             |    |     |
|------------------|----------|----------|------------------|------------------------------------------------------------------------------|-------------------------------------------------------------------|-----------------------------------------------------------------------------------------------------------------------------------------|---------------------------------------------------------------------------------------------------------------------------------------------------------------------|---------------------------------------------------------------------------------------------------------------------------------------------------|-------------|----|-----|
| Asensio 2010     | COC      | uri-     | A 32<br>HC<br>26 | IAPS<br>(negative +<br>positive)                                             | n.a.                                                              | n.a.                                                                                                                                    | HC>A (positive): <b>NAC/putamen/caudate</b> , thalamus, <b>dACC</b> ,<br><b>SMA</b> , premotor, <b>IPL/SPL</b><br>A>HC (negative): <b>dIPFC</b> , premotor, sensory | n.a.                                                                                                                                              | Spain       | 0  | no  |
| Caldwell 2015    | COC      | abs      | A 87<br>HC<br>87 | Social<br>agresion<br>images<br>(evaluating<br>non-<br>emotional<br>content) | n.a.                                                              | n.a.                                                                                                                                    | HC>A(aggressive): <b>parahippocampus</b> , thalamus, <b>vlPFC</b> , <b>vmPFC</b> ,<br><b>sgACC</b> , <b>rACC</b> , dmPFC, visual, auditory                          | duration abstinence ↓: <b>PCC</b>                                                                                                                 | USA         | 0  | no  |
| Crunelle 2015    | COC      | n.a.     | A 51<br>HC<br>32 | Affect<br>Matching<br>(angry +<br>fearful<br>faces)                          | n.a.                                                              | n.s.                                                                                                                                    | A>HC (negative): <b>hippocampus</b> , <b>amygdala</b> , thalamus                                                                                                    | n.s.                                                                                                                                              | Netherlands | 0  | no  |
| Canterberry 2016 | COC      | use      | A 20<br>HC<br>20 | IAPS<br>(negative +<br>positive)                                             | n.a.                                                              | n.a.                                                                                                                                    | HC>A: <b>rACC/mPFC</b> , <b>PCC</b> , auditory<br>HC>A (positive): <b>rACC/mPFC</b> , <b>PCC</b><br>HC>A (negative): <b>rACC/mPFC</b>                               | cigarettes/day ↑: visual<br>CAN comorbidity ↓: visual                                                                                             | USA         | 50 | YES |
| Kober 2016       | COC      | n.a.     | A 30<br>HC<br>45 | Drug/Sad<br>Videos                                                           | n.a.                                                              | A>HC:<br>↑ <b>craving</b>                                                                                                               | G*T (A ↑)(Drug)(Early): <b>rACC</b><br>G*T (A ↑)(Drug)(Late): <b>dmPFC</b> , <b>dACC</b>                                                                            | n.a.                                                                                                                                              | USA         | 40 | YES |
| Daughters 2017   | COC      | n.a.     | A 21<br>HC<br>25 | PASAT-M<br>(distress<br>induction)                                           | n.a.                                                              | HC>A: distress<br>tolerance                                                                                                             | HC>A (distress): premotor/FEF, <b>SMA</b> , <b>SPL</b>                                                                                                              | n.a.                                                                                                                                              | USA         | 10 | no  |
| Costumero 2017   | COC      | n.a.     | A 20<br>HC<br>21 | Erotic<br>Images                                                             | n.a.                                                              | n.s.                                                                                                                                    | G*T (A ↓)(erotic): <b>vlPFC</b> , <b>dIPFC</b> , <b>SMA</b> , <b>OFC</b> , <b>SPL</b> , <b>IPL</b> , temporal<br>pole, visual, auditory                             | Duration of Abstinence ↑: <b>vlPFC</b> ,<br><b>dIPFC</b> , <b>SMA</b> , <b>OFC</b> , <b>SPL</b> , <b>IPL</b> , temporal<br>pole, visual, auditory | Spain       | 0  | no  |
| Schmidt 2014     | HER      | met<br>h | A 22<br>HC<br>17 | Fearful<br>faces<br>(evaluating<br>gender)                                   | HER<br>admin<br>istrati<br>on<br>(indivi<br>dualiz<br>ed<br>dose) | G*T(↑A)(place<br>bo): state<br>anxiety,<br>cortisol/ACTH<br>(stress)<br>G*T (↓A) (HER<br>administration)<br>: craving, ACTH<br>(stress) | A>HC (placebo administration): <b>amygdala</b> , <b>precuneus</b>                                                                                                   | n.s.                                                                                                                                              | Swiss       | 36 | no  |
| Payer 2011       | MET<br>H | use      | A 25<br>HC<br>23 | Angry +<br>fearful<br>faces<br>(Affect<br>Matching +<br>Labeling)            | n.a.                                                              | n.a.                                                                                                                                    | HC>A (negative): <b>vlPFC</b>                                                                                                                                       | n.a.                                                                                                                                              | USA         | 41 | YES |

|                                 |       |      |                   |                                                   |                    |                                    |                                                                                                                                                                                                                                                                                                                                                                                                                                                      |                                                                                                                                                                                                                                                                                      |         |     |     |
|---------------------------------|-------|------|-------------------|---------------------------------------------------|--------------------|------------------------------------|------------------------------------------------------------------------------------------------------------------------------------------------------------------------------------------------------------------------------------------------------------------------------------------------------------------------------------------------------------------------------------------------------------------------------------------------------|--------------------------------------------------------------------------------------------------------------------------------------------------------------------------------------------------------------------------------------------------------------------------------------|---------|-----|-----|
| Payer 2012                      | MET H | use  | A 46 HC 46        | Angry + fearful faces (passive viewing)           | n.a.               | n.a.                               | HC>A (negative): <b>dIPFC</b>                                                                                                                                                                                                                                                                                                                                                                                                                        | n.a.                                                                                                                                                                                                                                                                                 | USA     | 42  | YES |
| Hong 2017                       | NIC   | n.a. | A 15 HC 15        | Drug/Aversive Videos                              | n.a.               | n.a.                               | A>HC (Drug): <b>sgACC</b> , temporal pole<br>HC>A (Drug): premotor<br>A>HC (negative): premotor<br>HC>A: (negative): <b>insula</b> , <b>dIPFC</b> , <b>sgACC</b> , <b>dACC</b> , precuneus, auditory, cerebellum                                                                                                                                                                                                                                     | NIC Dependence ↑: <b>sgACC</b>                                                                                                                                                                                                                                                       | Korea   | 0   | no  |
| Landi 2011                      | SUB   | use  | 26 A 28 HC        | Infant faces + voices (passive viewing/listening) | all pregnant       | n.a.                               | HC>A (happy): <b>parahippocampus</b> , <b>dIPFC</b> , <b>SMA</b> , vmPFC/dmPFC, visual, sensory, cerebellum<br>HC>A (sad): <b>parahippocampus</b> , thalamus, <b>insula</b> , <b>vIPFC</b> , <b>dIPFC</b> , <b>SMA</b> , vmPFC, <b>dACC</b> , precuneus, <b>PCC</b> , <b>IPL</b> , auditory, sensory, cerebellum<br>HC>A(distress): <b>amygdala</b> , <b>parahippocampus</b> , thalamus, <b>vIPFC</b> , <b>dIPFC</b> , <b>SMA</b> , premotor, visual | n.a.                                                                                                                                                                                                                                                                                 | USA     | 100 | no  |
| <b>Sensory processing</b>       |       |      |                   |                                                   |                    |                                    |                                                                                                                                                                                                                                                                                                                                                                                                                                                      |                                                                                                                                                                                                                                                                                      |         |     |     |
| May 2013                        | MET H | uri- | A 25 HC 17        | CPT                                               | soft touch         | n.s.                               | HC>A: <b>dorsal caudate</b> , thalamus, <b>anterior insula</b> , <b>dACC</b> , <b>dIPFC</b> (right), <b>SMA</b> , <b>IPL</b><br>G*T ↓(A) (touch): thalamus, <b>dACC</b> , visual<br>G*T ↑(A) (touch): <b>dIPFC</b> (left)                                                                                                                                                                                                                            | n.a.                                                                                                                                                                                                                                                                                 | USA     | 24  | no  |
| Stewart 2014                    | MET H | uri- | A 20 HC 22        | Two Choice Prediction Task                        | aversive breathing | HC>A: Adaptive behavior after loss | HC>A : thalamus, <b>anterior insula</b> , <b>vIPFC</b> , <b>aPFC</b> , <b>IPL</b> , dmPFC, <b>sensory</b> , visual, auditory, cerebellum<br>G*T (↓A) (aversive breathing): <b>ventral striatum</b> , thalamus, posterior insula, <b>dACC</b> , <b>PCC</b> , <b>IPL</b> , <b>sensory</b> , visual<br>G*T (A ↓) (Loss): <b>dACC</b> , <b>PCC</b>                                                                                                       | n.a.                                                                                                                                                                                                                                                                                 | USA     | 0   | no  |
| Stewart 2015a                   | STIM  | uri- | cA 19 pA 18 HC 21 | CPT                                               | aversive breathing | n.s.                               | HC>cA,pA: thalamus, mid insula, <b>dIPFC</b> (right), <b>aPFC</b> , <b>sensory</b> pA,HC>cA: <b>vIPFC</b> , <b>dIPFC</b> (left), <b>SMA</b><br>G*T ↓(cA) (aversive breathing): <b>anterior insula</b> , <b>vIPFC</b>                                                                                                                                                                                                                                 | STIM > CAN use ↓: <b>vIPFC</b> , <b>dIPFC</b><br>AMP lifetime use ↓: <b>dorsal caudate</b> , thalamus, posterior insula, <b>dIPFC</b> (left)<br>CAN lifetime use ↓: <b>dorsal caudate</b> , thalamus, <b>dACC</b> , auditory, <b>sensory</b><br>COC lifetime use ↑: posterior insula | USA     | 48  | no  |
| Stewart 2015b                   | STIM  | uri- | cA 18 pA 15 HC 15 | CPT                                               | soft touch         | n.s.                               | cA>pA,HC: <b>anterior insula</b> , <b>vIPFC</b> , <b>SMA</b> , <b>IPL</b><br>G*T ( ↑cA)(touch): mid insula, auditory                                                                                                                                                                                                                                                                                                                                 | n.s.                                                                                                                                                                                                                                                                                 | USA     | 50  | no  |
| <b>Attention/Working Memory</b> |       |      |                   |                                                   |                    |                                    |                                                                                                                                                                                                                                                                                                                                                                                                                                                      |                                                                                                                                                                                                                                                                                      |         |     |     |
| Charlet 2014                    | ALC   | abs  | A 40 HC 40        | N-back                                            | n.a.               | n.s.                               | n.s.                                                                                                                                                                                                                                                                                                                                                                                                                                                 | n.s.                                                                                                                                                                                                                                                                                 | Germany | 25  | no  |

|                    |     |             |                  |                                             |      |                                                       |                                                                                                                                                                     |                                                                                               |                 |      |     |
|--------------------|-----|-------------|------------------|---------------------------------------------|------|-------------------------------------------------------|---------------------------------------------------------------------------------------------------------------------------------------------------------------------|-----------------------------------------------------------------------------------------------|-----------------|------|-----|
| Jansen 2015        | ALC | abs         | A 26<br>HC<br>22 | self-paced<br>switch task                   | n.a. | n.s.                                                  | n.s.                                                                                                                                                                | n.a.                                                                                          | Netherl<br>ands | 0    | no  |
| Cousijn 2014a      | CAN | use/<br>abs | A 22<br>HC<br>23 | N-back                                      | n.a. | n.s.                                                  | n.s.                                                                                                                                                                | n.s.                                                                                          | Netherl<br>ands | 32   | no  |
| Cousijn 2014b      | CAN | use/<br>abs | A 30<br>HC<br>41 | N-back                                      | n.a. | n.s.                                                  | n.s.                                                                                                                                                                | higher CAN use ↑: <i>vlPFC, dlPFC, premotor, aPFC, dACC, IPL</i>                              | Netherl<br>ands | 34   | no  |
| Rose 2010          | NIC | use         | A 25<br>HC<br>23 | Intention/<br>Attention<br>Task             | NIC  | A>HC: accuracy                                        | A>HC (Placebo administration): <i>vlPFC, auditory;</i><br>A>HC (NIC administration) ↑: <i>aPFC, insula, dACC, vlPFC, dlPFC, motor, visual, auditory, cerebellum</i> | n.a.                                                                                          | USA             | 52   | no  |
| Sutherland 2011    | NIC | use         | A 30<br>HC<br>27 | Attention +<br>Working<br>Memory<br>(CEFER) | NIC  | NIC<br>administration<br>(↑A): speed,<br>accuracy     | A>HC: <i>aPFC, insula, dlPFC, SMA</i>                                                                                                                               | years smoking ↓: <i>insula</i><br>lifetime number cigarettes smoked<br>↓: <i>aPFC, insula</i> | USA             | 53   | no  |
| <b>Other tasks</b> |     |             |                  |                                             |      |                                                       |                                                                                                                                                                     |                                                                                               |                 |      |     |
| Bagga 2013         | ALC | abs         | A 18<br>HC<br>18 | Semantic<br>Judgement<br>Task               | n.a. | n.s.                                                  | A>HC: <i>precuneus, IPL, sensory, auditory</i>                                                                                                                      | n.a.                                                                                          | India           | 0    | no  |
| Bagga 2014         | ALC | abs         | A 18<br>HC<br>18 | Abstract<br>Reasoning<br>Task               | n.a. | HC>A: speed                                           | A>HC: <i>vlPFC, SPL, sensory, visual</i>                                                                                                                            | n.a.                                                                                          | India           | 0    | no  |
| Sjoerds 2013       | ALC | abs         | A 31<br>HC<br>19 | Instrumental<br>learning                    | n.a. | HC>A: Better<br>outcome<br>devaluation<br>performance | n.s.                                                                                                                                                                | n.s.                                                                                          | Netherl<br>ands | 42   | no  |
| King 2011          | CAN | use         | A 30<br>HC<br>30 | Finger<br>tapping                           | n.a. | A>HC: speed,<br>errors                                | HC>A (tapping): <i>premotor, motor, visual</i><br>A>HC (tapping): <i>aPFC, dlPFC, SMA, SPL, sensory</i>                                                             | n.a.                                                                                          | USA             | 47   | YES |
| Carey 2015         | CAN | use         | A 15<br>HC<br>15 | Paired<br>Associate<br>Learning<br>Task     | n.a. | HC>A: ↑<br>Accuracy<br>HC>A: ↑ Error<br>correction    | G*T (↓A) (corrected errors): <i>putamen, dACC, IPL, hippocampus/parahippocampus, SPL, temporal pole, thalamus, visual</i>                                           | n.a.                                                                                          | Australi<br>a   | 27   | no  |
| Riba 2015          | CAN | abs         | A 16<br>HC<br>16 | False<br>Memory<br>Induction<br>Paradigm    | n.a. | HC>A: Fewer<br>False Memories                         | n.s.                                                                                                                                                                | n.s.                                                                                          | Spain           | n.a. | no  |
| Gilman 2016        | CAN | abs         | A 20<br>HC<br>20 | Social<br>Influence<br>Paradigm             | n.a. | n.s.                                                  | A>HC (decision): <i>dlPFC, SPL, auditory</i>                                                                                                                        | n.a.                                                                                          | USA             | 50   | no  |

|                        |          |      |                      |                                                      |      |                |      |      |     |    |    |
|------------------------|----------|------|----------------------|------------------------------------------------------|------|----------------|------|------|-----|----|----|
| Ghahre<br>mani<br>2011 | MET<br>H | use  | A 16<br>HC<br>19     | Determinis<br>tic<br>Associative<br>Learning<br>Task | n.a. | HC>A: Accuracy | n.s. | n.a. | USA | 38 | no |
| Fede<br>2016           | STIM     | n.a. | A<br>131<br>HC<br>80 | Moral<br>Decision<br>Task                            | n.a. | n.s.           | n.s. | n.s. | USA | 0  | no |

A= Addiction group, HC = Healthy Control group, ↓ = decreased; ↑ = increased, A>HC = higher activation in the Addiction group (main effect), G\*T (↓A) = group\*task interaction effect with reduction in the addiction group, x = main effect across all conditions;

ALC = alcohol, CAN = Cannabis, COC = cocaine, HER = heroin, MDMA = ecstasy, METH = methamphetamine, NIC = nicotine, POLY = polysubstance, STIM = stimulants;

abs = abstinent (no use 24 hour before scanning), meth = methadone; parR = partial remission (abstinent > 6 months), rem = remission (abstinent > 1 year), uri- = urine negative, uri+ = urine positive, use = not abstinent;

A = Addicted, cA = current Addicted, cU = casual User, lateA = late onset Addicted, pA = past Addicted, prA = partially remitted Addicted, frA = fully remitted Addicted, lowA = addiction with lower level use, highA = addiction with higher level use, HC = Healthy Controls;

ADHD = Attention Deficit Hyperactivity Disorder, MDD = Major Depression Disorder, PD = Personality Disorder;

BART = Balloon Analogue Risk Task, CEFER= Central Executive Functioning-Event-Related, CPT = Continous Performance Test, DMT = Delayed Memory task, cwStroop = color word Stroop, dwStroop = Drug Word Stroop, IAT = Implicit Association Test, ICT = Intertemporal Choice Task, IGT = Iowa Gambling Task, MID = Monetary Incentive Delay, PASAT-M = paced auditory serial addition task, RGT = Risky Gains Task, rStroop = rewarded Stroop, SST = Stop Signal Task, BART = Balloon Analogue Risk Task, PIT = Pavlovian-to-Instrumental-Transfer, MSIT = Multisource Interference Task;

CBT = cognitive behavioral therapy, MMT = Methadone Maintenance Treatment, MPH = Methylphenidate Intervention, TAU = Treatment as usual;

Grey shaded regions are not relevant for the specific task.

aPFC = anterior prefrontal cortex, dACC = dorsal anterior cingulate cortex, dlPFC = dorsolateral prefrontal cortex, dmPFC = dorsomedial prefrontal cortex, FEF = Frontal eye field, IPL = inferior parietal lobe, Nac = Nucleus Accumbens, OFC = orbitofrontal cortex, pgACC = perigenual anterior cingulate cortex, PCC = posterior cingulate cortex, rACC = rostral anterior cingulate cortex, sgACC = subgenual anterior cingulate cortex, SMA = supplementary motor area, SPL = superior parietal lobe, vlPFC = ventrolateral prefrontal cortex, vmPFC = ventromedial prefrontal cortex, VTA = Ventral Tegmental Area

n.a. = not available, n.s. = not significant
