# Supplementary material
Source: PubMed Central journal article supplement (PMC5995133)
Supplement: NIHMS957678-supplement-3.pdf [file NIHMS957678-supplement-3.pdf]

## Supplementary Material: Included Studies

- Albein-Urios, N., Verdejo-Román, J., Asensio, S., Soriano-Mas, C., Martínez-González, J.M., and Verdejo-García, A. (2012). Re-appraisal of negative emotions in cocaine dependence: Dysfunctional corticolimbic activation and connectivity. *Addict. Biol.* *19*, 415–426.
- Alexander, W.H., Fukunaga, R., Finn, P., and Brown, J.W. (2015). Reward salience and risk aversion underlie differential ACC activity in substance dependence. *NeuroImage Clin.* *8*, 59–71.
- Arcurio, L.R., Finn, P.R., and James, T.W. (2015). Neural mechanisms of high-risk decisions-to-drink in alcohol-dependent women. *Addict. Biol.* *20*, 390–406.
- Asensio, S., Romero, M.J., Palau, C., Sanchez, A., Senabre, I., Morales, J.L., Carcelen, R., and Romero, F.J. (2010). Altered neural response of the appetitive emotional system in cocaine addiction: An fMRI Study. *Addict. Biol.* *15*, 504–516.
- Bagga, D., Singh, N., Modi, S., Kumar, P., Bhattacharya, D., Garg, M.L., and Khushu, S. (2013). Assessment of lexical semantic judgment abilities in alcohol-dependent subjects: An fMRI study. *J. Biosci.* *38*, 905–915.
- Bagga, D., Singh, N., Singh, S., Modi, S., Kumar, P., Bhattacharya, D., Garg, M.L., and Khushu, S. (2014). Assessment of abstract reasoning abilities in alcohol-dependent subjects: An fMRI study. *Neuroradiology* *56*, 69–77.
- Balodis, I.M., Kober, H., Worhunsky, P.D., Stevens, M.C., Pearson, G.D., Carroll, K.M., and Potenza, M.N. (2016). Neurofunctional Reward Processing Changes in Cocaine Dependence During Recovery. *Neuropsychopharmacology* *41*, 2112–2121.
- Barrós-Loscertales, A., Bustamante, J.C., Ventura-Campos, N., Llopis, J.J., Parcet, M.A., and Ávila, C. (2011). Lower activation in the right frontoparietal network during a counting Stroop task in a cocaine-dependent group. *Psychiatry Res. - Neuroimaging* *194*, 111–118.
- Bednarski, S.R., Erdman, E., Luo, X., Zhang, S., Hu, S., and Li, C.-S.R. (2012). Neural Processes of an Indirect Analog of Risk Taking in Young Nondependent Adult Alcohol Drinkers—An fMRI Study of the Stop Signal Task. *Alcohol. Clin. Exp. Res.* *36*, 768–779.
- Bell, R.P., Garavan, H., and Foxe, J.J. (2014a). Neural correlates of craving and impulsivity in abstinent former cocaine users: Towards biomarkers of relapse risk. *Neuropharmacology* *85*, 461–470.
- Bell, R.P., Foxe, J.J., Ross, L.A., and Garavan, H. (2014b). Intact inhibitory control processes in abstinent drug abusers (I): A functional neuroimaging study in former cocaine addicts. *Neuropharmacology* *82*, 143–150.
- Beylergil, S.B., Beck, A., Deserno, L., Lorenz, R.C., Rapp, M.A., Schlagenhauf, F., Heinz, A., and Obermayer, K. (2017). Dorsolateral prefrontal cortex contributes to the impaired behavioral adaptation in alcohol dependence. *NeuroImage Clin.* *15*, 80–94.
- Bischoff-Grethe, A., Connolly, C.G., Jordan, S.J., Brown, G.G., Paulus, M.P., Tapert, S.F., Heaton, R.K., Woods, S.P., and Grant, I. (2017). Altered reward expectancy in individuals with recent methamphetamine dependence. *J. Psychopharmacol.* *31*, 17–30.
- Caldwell, B.M., Harenski, C.L., Harenski, K.A., Fede, S.J., Steele, V.R., Koenigs, M.R., and Kiehl, K.A. (2015). Abnormal frontostriatal activity in recently abstinent cocaine users during implicit moral processing. *Front Hum Neurosci* *9*, 565.
- Canterberry, M., Peltier, M.R., Brady, K.T., and Hanlon, C.A. (2016). Attenuated neural response to emotional cues in cocaine-dependence: a preliminary analysis of gender differences. *Am. J. Drug Alcohol Abuse* *42*, 577–586.

- Carey, S.E., Nestor, L., Jones, J., Garavan, H., and Hester, R. (2015). Impaired learning from errors in cannabis users: Dorsal anterior cingulate cortex and hippocampus hypoactivity. *Drug Alcohol Depend.* *155*, 175–182.
- Carroll, A.J., Sutherland, M.T., Salmeron, B.J., Ross, T.J., and Stein, E.A. (2015). Greater externalizing personality traits predict less error-related insula and anterior cingulate cortex activity in acutely abstinent cigarette smokers. *Addict. Biol.* *20*, 377–389.
- Charlet, K., Beck, A., Jorde, A., Wimmer, L., Vollstädt-Klein, S., Gallinat, J., Walter, H., Kiefer, F., and Heinz, A. (2014). Increased neural activity during high working memory load predicts low relapse risk in alcohol dependence. *Addict. Biol.* *19*, 402–414.
- Costumero, V., Bustamante, J.C., Rosell-Negre, P., Fuentes, P., Llopis, J.J., Ávila, C., and Barrós-Loscertales, A. (2017). Reduced activity in functional networks during reward processing is modulated by abstinence in cocaine addicts. *Addict. Biol.* *22*, 479–489.
- Cousijn, J., Goudriaan, A.E., Ridderinkhof, K.R., van den Brink, W., Veltman, D.J., and Wiers, R.W. (2012). Approach-Bias Predicts Development of Cannabis Problem Severity in Heavy Cannabis Users: Results from a Prospective fMRI Study. *PLoS One* *7*.
- Cousijn, J., Goudriaan, A.E., Ridderinkhof, K.R., Van Den Brink, W., Veltman, D.J., and Wiers, R.W. (2013a). Neural responses associated with cue-reactivity in frequent cannabis users. *Addict. Biol.* *18*, 570–580.
- Cousijn, J., Wiers, R.W., Ridderinkhof, K.R., Van Den Brink, W., Veltman, D.J., Porrino, L.J., and Goudriaan, A.E. (2013b). Individual differences in decision making and reward processing predict changes in cannabis use: A prospective functional magnetic resonance imaging study. *Addict. Biol.* *18*, 1013–1023.
- Cousijn, J., Vingerhoets, W.A.M., Koenders, L., De Haan, L., Van Den Brink, W., Wiers, R.W., and Goudriaan, A.E. (2014a). Relationship between working-memory network function and substance use: A 3-year longitudinal fMRI study in heavy cannabis users and controls. *Addict. Biol.* *19*, 282–293.
- Cousijn, J., Wiers, R.W., Ridderinkhof, K.R., van den Brink, W., Veltman, D.J., and Goudriaan, A.E. (2014b). Effect of baseline cannabis use and working-memory network function on changes in cannabis use in heavy cannabis users: A prospective fMRI study. *Hum. Brain Mapp.* *35*, 2470–2482.
- Crunelle, C.L., Kaag, A.M., Van den Munkhof, H.E., Reneman, L., Homberg, J.R., Sabbe, B., Van den Brink, W., and Van Wingen, G. (2015). Dysfunctional amygdala activation and connectivity with the prefrontal cortex in current cocaine users. *Hum. Brain Mapp.* *36*, 4222–4230.
- Czapla, M., Baeuchl, C., Simon, J.J., Richter, B., Kluge, M., Friederich, H.C., Mann, K., Herpertz, S.C., and Loeber, S. (2017). Do alcohol-dependent patients show different neural activation during response inhibition than healthy controls in an alcohol-related fMRI go/no-go-task? *Psychopharmacology (Berl)*. *234*, 1001–1015.
- Daughters, S.B., Ross, T.J., Bell, R.P., Yi, J.Y., Ryan, J., and Stein, E.A. (2017). Distress tolerance among substance users is associated with functional connectivity between prefrontal regions during a distress tolerance task. *Addict. Biol.* *22*, 1378–1390.
- Enzi, B., Lissek, S., Edel, M.A., Tegenthoff, M., Nicolas, V., Scherbaum, N., Juckel, G., and Roser, P. (2015). Alterations of monetary reward and punishment processing in chronic cannabis users: An fMRI study. *PLoS One* *10*, 1–13.
- Fede, S.J., Harenski, C.L., Schaich Borg, J., Sinnott-Armstrong, W., Rao, V., Caldwell, B.M., Nyalakanti, P.K., Koenigs, M.R., Decety, J., Calhoun, V.D., et al. (2016). Abnormal fronto-limbic engagement in incarcerated stimulant users during moral processing. *Psychopharmacology (Berl)*. *233*, 3077–3087.

- Filbey, F.M., Dunlop, J., Ketcherside, A., Baine, J., Rhinehardt, T., Kuhn, B., DeWitt, S., and Alvi, T. (2016). fMRI study of neural sensitization to hedonic stimuli in long-term, daily cannabis users. *Hum. Brain Mapp.* *37*, 3431–3443.
- Ford, K.A., Wammes, M., Neufeld, R., Mitchell, D., Theberge, J., Williamson, P., and Osuch, E. (2014). Unique functional abnormalities in youth with combined marijuana use and depression: An fMRI study. *Front. Psychiatry* *5*, 1–11.
- Fryer, S.L., Jorgensen, K.W., Yetter, E.J., Daurignac, E.C., D., W.T., Shanbhag, H., Krystale, J.H., and Mathalon, D.H. (2013). Differential Brain Response to Alcohol Cue Distractors across Stages of Alcohol Dependence. *Biol. Psychol.* *92*, 282–291.
- Ghahremani, D.G., Tabibnia, G., Monterosso, J., Helleman, G., Poldrack, R. a, and London, E.D. (2011). Effect of Modafinil on Learning and Task-Related Brain Activity in Methamphetamine-Dependent and Healthy Individuals. *Neuropsychopharmacology* *36*, 950–959.
- Gilman, J.M., Davis, M.B., and Hommer, D.W. (2010). Greater activation in left hemisphere language-related regions during simple judgment tasks among substance-dependent patients in treatment for alcoholism. *Alcohol. Clin. Exp. Res.* *34*, 331–341.
- Gilman, J.M., Lee, S., Kuster, J.K., Lee, M.J., Kim, B.W., van der Kouwe, A., Blood, A.J., and Breiter, H.C. (2016). Variable activation in striatal subregions across components of a social influence task in young adult cannabis users. *Brain Behav.* *6*, 1–19.
- Gowin, J.L., Stewart, J.L., May, A.C., Ball, T.M., Wittmann, M., Tapert, S.F., and Paulus, M.P. (2014). Altered cingulate and insular cortex activation during risk-taking in methamphetamine dependence: Losses lose impact. *Addiction* *109*, 237–247.
- Gowin, J.L., May, A.C., Wittmann, M., Tapert, S.F., and Paulus, M.P. (2017). Doubling Down: Increased Risk-Taking Behavior Following a Loss by Individuals With Cocaine Use Disorder Is Associated With Striatal and Anterior Cingulate Dysfunction. *Biol. Psychiatry Cogn. Neurosci. Neuroimaging* *2*, 94–103.
- Gradin, V.B., Baldacchino, A., Balfour, D., Matthews, K., and Steele, J.D. (2014). Abnormal Brain Activity During a Reward and Loss Task in Opiate Dependent Patients Receiving Methadone Maintenance Therapy. *Neuropsychopharmacology* *39*, 1–35.
- Grodin, E.N., Steckler, L.E., and Momenan, R. (2016). Altered striatal response during effort-based valuation and motivation in alcohol-dependent individuals. *Alcohol Alcohol.* *51*, 638–646.
- Harle, K.M., Shenoy, P., Stewart, J.L., Tapert, S.F., Yu, A.J., and Paulus, M.P. (2014). Altered Neural Processing of the Need to Stop in Young Adults at Risk for Stimulant Dependence. *J. Neurosci.* *34*, 4567–4580.
- Hester, R., Bell, R.P., Foxe, J.J., and Garavan, H. (2013). The influence of monetary punishment on cognitive control in abstinent cocaine-users. *Drug Alcohol Depend.* *133*, 86–93.
- Hong, J.S., Kim, S.M., Jung, H.Y., Kang, K.D., Min, K.J., and Han, D.H. (2017). Cognitive avoidance and aversive cues related to tobacco in male smokers. *Addict. Behav.* *73*, 158–164.
- Hu, S., Ide, J.S., Zhang, S., Sinha, R., and Li, C.S.R. (2015). Conflict anticipation in alcohol dependence - A model-based fMRI study of stop signal task. *NeuroImage Clin.* *8*, 39–50.
- Jan, R.K., Lin, J.C., McLaren, D.G., Kirk, I.J., Kydd, R.R., and Russell, B.R. (2014). The effects of methylphenidate on cognitive control in active methamphetamine dependence using functional magnetic resonance imaging. *Front. Psychiatry* *5*, 1–18.
- Jansen, J.M., Van Holst, R.J., Van Den Brink, W., Veltman, D.J., Caan, M.W.A., and Goudriaan, A.E. (2015). Brain function during cognitive flexibility and white matter integrity in alcohol-dependent patients, problematic drinkers and healthy controls. *Addict. Biol.* *20*, 979–989.

- Jia, Z., Worhunsky, P.D., Carroll, K.M., Rounsaville, B.J., Stevens, M.C., Pearlson, G.D., and Potenza, M.N. (2011). An initial study of neural responses to monetary incentives as related to treatment outcome in cocaine dependence. *Biol. Psychiatry* *70*, 553–560.
- Kim, S.M., Han, D.H., Min, K.J., Kim, B.N., and Cheong, J.H. (2014). Brain activation in response to craving- and aversion-inducing cues related to alcohol in patients with alcohol dependence. *Drug Alcohol Depend.* *141*, 124–131.
- King, G.R., Ernst, T., Deng, W., Stenger, A., Gonzales, R.M.K., Nakama, H., and Chang, L. (2011). Altered Brain Activation During Visuomotor Integration in Chronic Active Cannabis Users: Relationship to Cortisol Levels. *J. Neurosci.* *31*, 17923–17931.
- Kober, H., DeVito, E.E., Deleone, C.M., Carroll, K.M., and Potenza, M.N. (2014). Cannabis Abstinence During Treatment and One-Year Follow-Up: Relationship to Neural Activity in Men. *Neuropsychopharmacology* *39*, 1–11.
- Kober, H., Lacadie, C.M., Wexler, B.E., Malison, R.T., Sinha, R., and Potenza, M.N. (2016). Brain Activity During Cocaine Craving and Gambling Urges: An fMRI Study. *Neuropsychopharmacology* *41*, 628–637.
- Koester, P., Volz, K.G., Tittgemeyer, M., Wagner, D., Becker, B., Gouzoulis-Mayfrank, E., and Daumann, J. (2013). Decision-making in Polydrug Amphetamine-type Stimulant Users: an fMRI Study. *Neuropsychopharmacology* *38*, 1377–1386.
- Kohno, M., Morales, A.M., Ghahremani, D.G., Helleman, G., and London, E.D. (2014). Risky Decision Making, Prefrontal Cortex, and Mesocorticolimbic Functional Connectivity in Methamphetamine Dependence. *JAMA Psychiatry* *71*, 812–820.
- Landi, N., Montoya, J., Kober, H., Rutherford, H.J.V., Mencl, W.E., Worhunsky, P.D., Potenza, M.N., and Mayes, L.C. (2011). Maternal neural responses to infant cries and faces: Relationships with substance use. *Front. Psychiatry* *2*, 1–13.
- Lee, E., Ku, J., Jung, Y.C., Lee, H., An, S.K., Kim, K.R., Yoon, K.J., and Namkoong, K. (2013). Neural evidence for emotional involvement in pathological alcohol craving. *Alcohol Alcohol.* *48*, 288–294.
- Li, Q., Wang, Y., Zhang, Y., Li, W., Yang, W., Zhu, J., Wu, N., Chang, H., Zheng, Y., Qin, W., et al. (2012). Craving correlates with mesolimbic responses to heroin-related cues in short-term abstinence from heroin: An event-related fMRI study. *Brain Res.* *1469*, 63–72.
- Li, Q., Li, W., Wang, H., Wang, Y., Zhang, Y., Zhu, J., Zheng, Y., Zhang, D., Wang, L., Li, Y., et al. (2015). Predicting subsequent relapse by drug-related cue-induced brain activation in heroin addiction: An event-related functional magnetic resonance imaging study. *Addict. Biol.* *20*, 968–978.
- Luijten, M., Veltman, D.J., Hester, R., Smits, M., Nijs, I.M.T., Peplinkhuizen, L., and Franken, I.H.A. (2013). The role of dopamine in inhibitory control in smokers and non-smokers: A pharmacological fMRI study. *Eur. Neuropsychopharmacol.* *23*, 1247–1256.
- Maurage, P., Joassin, F., Philippot, P., Heeren, A., Vermeulen, N., Mahau, P., Delperdange, C., Corneille, O., Luminet, O., and de Timary, P. (2012). Disrupted Regulation of Social Exclusion in Alcohol-Dependence: An fMRI Study. *Neuropsychopharmacology* *37*, 2067–2075.
- May, A.C., Stewart, J.L., Migliorini, R., Tapert, S.F., and Paulus, M.P. (2013). Methamphetamine Dependent Individuals Show Attenuated Brain Response to Pleasant Interoceptive Stimuli. *Drug Alcohol Depend.* *131*, 238–246.
- Meade, C.S., Hobkirk, A.L., Towe, S.L., Chen, N., Bell, R.P., and Huettel, S.A. (2017). Cocaine dependence modulates the effect of HIV infection on brain activation during intertemporal decision making. *Drug Alcohol Depend.* *178*, 443–451.

- Moeller, S.J., Tomasi, D., Honorio, J., Volkow, N.D., and Goldstein, R.Z. (2012). Dopaminergic involvement during mental fatigue in health and cocaine addiction. *Transl Psychiatry* 2, e176.
- Moeller, S.J., Konova, A.B., Parvaz, M.A., Tomasi, D., Lane, R.D., Fort, C., and Goldstein, R.Z. (2014a). Functional, Structural, and Emotional Correlates of Impaired Insight in Cocaine Addiction. *JAMA Psychiatry* 71, 61.
- Moeller, S.J., Froboese, M.I., Konova, A.B., Misyrlis, M., Parvaz, M.A., Goldstein, R.Z., and Alia-Klein, N. (2014b). Common and distinct neural correlates of inhibitory dysregulation: Stroop fMRI study of cocaine addiction and intermittent explosive disorder. *J. Psychiatr. Res.* 58, 55–62.
- Moeller, S.J., Honorio, J., Tomasi, D., Parvaz, M. a., Woicik, P. a., Volkow, N.D., and Goldstein, R.Z. (2014c). Methylphenidate enhances executive function and optimizes prefrontal function in both health and cocaine addiction. *Cereb. Cortex* 24, 643–653.
- Morein-Zamir, S., Simon Jones, P., Bullmore, E.T., Robbins, T.W., and Ersche, K.D. (2013). Prefrontal Hypoactivity Associated with Impaired Inhibition in Stimulant-Dependent Individuals but Evidence for Hyperactivation in their Unaffected Siblings. *Neuropsychopharmacology* 38, 1945–1953.
- Murphy, A., Nestor, L.J., McGonigle, J., Paterson, L., Boyapati, V., Ersche, K.D., Flechais, R., Kuchibatla, S., Metastasio, A., Orban, C., et al. (2017). Acute D3 Antagonist GSK598809 Selectively Enhances Neural Response During Monetary Reward Anticipation in Drug and Alcohol Dependence. *Neuropsychopharmacology* 42, 1925–1926.
- Payer, D.E., Lieberman, M.D., and London, E.D. (2011). Neural Correlates of Affect Processing and Aggression in Methamphetamine Dependence. *Arch. Gen. Psychiatry* 68, 271.
- Payer, D.E., Nurmi, E.L., Wilson, S.A., McCracken, J.T., and London, E.D. (2012). Effects of methamphetamine abuse and serotonin transporter gene variants on aggression and emotion-processing neurocircuitry. *Transl. Psychiatry* 2, e80.
- Ray, S., Haney, M., Hanson, C., Biswal, B., and Hanson, S.J. (2015). Modeling Causal Relationship Between Brain Regions Within the Drug-Cue Processing Network in Chronic Cocaine Smokers. *Neuropsychopharmacology* 40, 2960–2968.
- Riba, J., Valle, M., Sampedro, F., Rodríguez-Pujadas, A., Martínez-Horta, S., Kulisevsky, J., and Rodríguez-Fornells, A. (2015). Telling true from false: cannabis users show increased susceptibility to false memories. *Mol. Psychiatry* 20, 772–777.
- Roberts, G.M.P., and Garavan, H. (2010). Evidence of increased activation underlying cognitive control in ecstasy and cannabis users. *Neuroimage* 52, 429–435.
- Roberts, G.M.P., and Garavan, H. (2013). Neural mechanisms underlying ecstasy-related attentional bias. *Psychiatry Res. - Neuroimaging* 213, 122–132.
- Romanczuk-Seiferth, N., Koehler, S., Dreesen, C., Wuestenberg, T., and Heinz, A. (2015). Pathological gambling and alcohol dependence: Neural disturbances in reward and loss avoidance processing. *Addict. Biol.* 20, 557–569.
- Rose, E.J., Ross, T.J., Kurup, P.K., and Stein, E.A. (2010). Nicotine modulation of information processing is not limited to input (attention) but extends to output (intention). *Psychopharmacology (Berl)*. 209, 291–302.
- Rose, E.J., Ross, T.J., Salmeron, B.J., Lee, M., Shakleya, D.M., Huestis, M.A., and Stein, E.A. (2013). Acute nicotine differentially impacts anticipatory valence- and magnitude-related striatal activity. *Biol. Psychiatry* 73, 280–288.
- Schmaal, L., Joos, L., Koeleman, M., Veltman, D.J., Van Den Brink, W., and Goudriaan, A.E. (2013). Effects of modafinil on neural correlates of response inhibition in alcohol-dependent patients. *Biol.*

Psychiatry 73, 211–218.

Schmidt, A.A., Borgwardt, S., Gerber, H., Wiesbeck, G.A., Schmid, O., Riecher-Roessler, A., Smieskova, R., Lang, U.E., and Walter, M. (2014). Acute effects of heroin on negative emotional processing: Relation of amygdala activity and stress-related responses. *Biol. Psychiatry* 76, 289–296.

Schulte, T., Mueller-Oehring, E.M., Sullivan, E. V., and Pfefferbaum, A. (2012). Synchrony of corticostriatal-midbrain activation enables normal inhibitory control and conflict processing in recovering alcoholic men. *Biol. Psychiatry* 71, 269–278.

Seo, D., Lacadie, C.M., Tuit, K., Hong, K.-I., Constable, R.T., and Sinha, R. (2013). Disrupted Ventromedial Prefrontal Function, Alcohol Craving, and Subsequent Relapse Risk. *JAMA Psychiatry* 70, 727–739.

Sjoerds, Z., de Wit, S., van den Brink, W., Robbins, T.W., Beekman, A.T.F., Penninx, B.W.J.H., and Veltman, D.J. (2013). Behavioral and neuroimaging evidence for overreliance on habit learning in alcohol-dependent patients. *Transl. Psychiatry* 3, e337.

Sjoerds, Z., Van Den Brink, W., Beekman, A.T.F., Penninx, B.W.J.H., and Veltman, D.J. (2014a). Cue reactivity is associated with duration and severity of alcohol dependence: An fMRI study. *PLoS One* 9.

Sjoerds, Z., van den Brink, W., Beekman, A.T.F., Penninx, B.W.J.H., and Veltman, D.J. (2014b). Response inhibition in alcohol-dependent patients and patients with depression/anxiety: a functional magnetic resonance imaging study. *Psychol. Med.* 44, 1713–1725.

Smith, D.G., Jones, P.S., Bullmore, E.T., Robbins, T.W., and Ersche, K.D. (2013). Cognitive control dysfunction and abnormal frontal cortex activation in stimulant drug users and their biological siblings. *Transl. Psychiatry* 3, e257.

Smith, D.G., Simon Jones, P., Bullmore, E.T., Robbins, T.W., and Ersche, K.D. (2014). Enhanced orbitofrontal cortex function and lack of attentional bias to cocaine cues in recreational stimulant users. *Biol. Psychiatry* 75, 124–131.

de Sousa Fernandes Perna, E.B., Theunissen, E.L., Kuypers, K.P.C., Evers, E.A., Stiers, P., Toennes, S.W., Witteman, J., van Dalen, W., and Ramaekers, J.G. (2017). Brain reactivity to alcohol and cannabis marketing during sobriety and intoxication. *Addict. Biol.* 22, 823–832.

Stewart, J.L., May, A.C., Poppa, T., Davenport, P.W., Tapert, S.F., and Paulus, M.P. (2014). You are the danger: Attenuated insula response in methamphetamine users during aversive interoceptive decision-making. *Drug Alcohol Depend.* 142, 110–119.

Stewart, J.L., May, A.C., Tapert, S.F., and Paulus, M.P. (2015a). Hyperactivation to pleasant interoceptive stimuli characterizes the transition to stimulant addiction. *Drug Alcohol Depend.* 154, 264–270.

Stewart, J.L., Juavinett, A.L., May, A.C., Davenport, P.W., and Paulus, M.P. (2015b). Do you feel alright? Attenuated neural processing of aversive interoceptive stimuli in current stimulant users. *Psychophysiology* 52, 249–262.

Sutherland, M.T., Ross, T.J., Shakleya, D.M., Huestis, M.A., and Stein, E.A. (2011). Chronic smoking, but not acute nicotine administration, modulates neural correlates of working memory. *Psychopharmacology (Berl)*. 213, 29–42.

Tabatabaei-Jafari, H., Ekhtiari, H., Ganjgahi, H., Hassani-Abharian, P., Oghabian, M.-A., Moradi, A., Sadighi, N., and Zarei, M. (2014). Patterns of Brain Activation During Craving in Heroin Dependents Successfully Treated by Methadone Maintenance and Abstinence-Based Treatments. *J. Addict. Med.* 8, 123–129.

Tanabe, J., Reynolds, J., Krmpotich, T., Claus, E., Thompson, L.L., Du, Y.P., and Banich, M.T. (2013).

- Reduced neural tracking of prediction error in Substance-dependent individuals. *Am. J. Psychiatry* 170, 1356–1363.
- Tomasi, D., Volkow, N.D., Wang, R., Carrillo, J.H., Maloney, T., Alia-Klein, N., Woicik, P. a., Telang, F., and Goldstein, R.Z. (2010). Disrupted functional connectivity with dopaminergic midbrain in cocaine abusers. *PLoS One* 5, 1–10.
- Vollstädt-Klein, S., Kobiella, A., Bühler, M., Graf, C., Fehr, C., Mann, K., and Smolka, M.N. (2011). Severity of dependence modulates smokers' neuronal cue reactivity and cigarette craving elicited by tobacco advertisement. *Addict. Biol.* 16, 166–175.
- Wang, Y., Wang, H., Li, W., Zhu, J., Gold, M.S., Zhang, D., Wang, L., Li, Y., Yan, X., Cheng, J., et al. (2014). Reduced responses to heroin-cue-induced craving in the dorsal striatum: Effects of long-term methadone maintenance treatment. *Neurosci. Lett.* 581, 120–124.
- Wesley, M.J., Hanlon, C.A., and Porrino, L.J. (2011). Poor decision-making by chronic marijuana users is associated with decreased functional responsiveness to negative consequences. *Psychiatry Res. - Neuroimaging* 191, 51–59.
- Wesley, M.J., Lile, J.A., Hanlon, C.A., and Porrino, L.J. (2016). Abnormal medial prefrontal cortex activity in heavy cannabis users during conscious emotional evaluation. *Psychopharmacology (Berl)*. 233, 1035–1044.
- Wiers, C.E., Shumay, E., Volkow, N.D., Frieling, H., Kotsiari, A., Lindenmeyer, J., Walter, H., and Berman, F. (2015). Effects of depressive symptoms and peripheral DAT methylation on neural reactivity to alcohol cues in alcoholism. *Transl. Psychiatry* 5, e648.
- Worhunsky, P., and Stevens, M. (2013). Functional Brain Networks Associated with Cognitive Control, Cocaine Dependence and Treatment Outcome. *Psychol. ...* 27, 477–488.
- Worhunsky, P.D., Malison, R.T., Rogers, R.D., and Potenza, M.N. (2014). Altered neural correlates of reward and loss processing during simulated slot-machine fMRI in pathological gambling and cocaine dependence. *Drug Alcohol Depend.* 145, 77–86.
- Worhunsky, P.D., Potenza, M.N., and Rogers, R.D. (2017). Alterations in functional brain networks associated with loss-chasing in gambling disorder and cocaine-use disorder. *Drug Alcohol Depend.* 178, 363–371.
- Yalachkov, Y., Kaiser, J., Görres, A., Seehaus, A., and Naumer, M.J. (2013). Sensory modality of smoking cues modulates neural cue reactivity. *Psychopharmacology (Berl)*. 225, 461–471.
- Yamamoto, D.J., Reynolds, J., Krmpotich, T., Banich, M.T., Thompson, L., and Tanabe, J. (2014). Temporal profile of fronto-striatal-limbic activity during implicit decisions in drug dependence. *Drug Alcohol Depend.* 136, 108–114.
- Yin, J.-J., Ma, S.-H., Xu, K., Wang, Z.-X., Le, H.-B., Huang, J.-Z., Fang, K.-M., Liao, L.-M., and Cai, Z.-L. (2012). Functional magnetic resonance imaging of methamphetamine craving. *Clin. Imaging* 36, 695–701.
- Yip, S.W., DeVito, E.E., Kober, H., Worhunsky, P.D., Carroll, K.M., and Potenza, M.N. (2014). Pretreatment measures of brain structure and reward-processing brain function in cannabis dependence: An exploratory study of relationships with abstinence during behavioral treatment. *Drug Alcohol Depend.* 140, 33–41.
- Zimmermann, K., Walz, C., Derckx, R.T., Kendrick, K.M., Weber, B., Dore, B., Ochsner, K.N., Hurlmann, R., and Becker, B. (2017). Emotion regulation deficits in regular marijuana users. *Hum. Brain Mapp.* 38, 4270–4279.
